# Supplementary material
Source: publisher figshare collection journal article supplement (https://gsapubs.figshare.com/ndownloader/files/25361288)
Supplement: Supplementary file 1 [file 25361288]

## Sheet: Table 1
TABLE S1. GEOCHEMICAL DATA FOR BIGHORN BASIN AND SOUTH DAKOTA BENTONITES
Sample Name	Age*		SiO2	Al2O3	Fe2O3	MnO	MgO	CaO	Na2O	K2O	TiO2	P2O5	Sc	Be	V	Ba	Sr	Y	Zr	Cr	Co	Ni	Cu	Zn	Ga	Ge	As	Rb	Nb	Mo	Ag	In	Sn	Sb	Cs	La	Ce	Pr	Nd	Sm	Eu	Gd	Tb	Dy	Ho	Er	Tm	Yb	Lu
THERM-F3-1	96.3		73.1921	17.4262	3.74291	0.0111065	2.08803	1.85479	0.855204	0.699712	0.11884	0.0111065	5	2	5	364	254	18	198	20	1	20	10	80	25	1	5	17	27	2	0.8	0.2	7	0.5	2.1	24.4	54.6	6.17	21.5	4.6	0.37	3.7	0.7	4	0.8	2.1	0.31	2.1	0.34
THERM-MB-2	98		67.1502	21.8833	4.0721	0.0101521	1.83865	1.77097	1.97401	0.981365	0.240265	0.0789604	4	2	6	383	314	27	194	20	1	20	10	80	28	1	5	23	22	3	0.8	0.2	8	2.2	2.3	56	110	11.9	39.6	7.6	0.66	6	1	5.5	1	2.8	0.41	2.4	0.34
THERM-MA-3	97		64.1766	22.2095	4.37731	0.0179398	2.43981	4.46103	1.00463	1.00463	0.236805	0.0717592	4	2	10	398	412	32	224	20	2	20	10	130	25	1	5	24	19	2	0.8	0.2	7	1.5	1.3	49.7	99.5	11.1	40.4	8.8	0.84	7.4	1.2	6.1	1.1	3.2	0.46	2.9	0.41
THERM-BB-4	96.5		70.2776	19.365	3.95319	0.0267258	1.90421	2.11579	1.39197	0.701551	0.197102	0.0668144	2	2	8	382	486	28	212	20	1	20	10	80	22	1	5	17	16	5	0.7	0.2	7	0.8	2.3	49.8	91.9	9.83	34.1	6.4	0.61	5.2	0.9	4.9	0.9	2.6	0.37	2.3	0.35
THERM-RB-5	100		70.9966	14.61	2.66251	0.345224	1.59074	7.59268	1.50049	0.473837	0.160202	0.0676911	5	3	9	251	168	33	155	20	1	20	10	60	19	1	5	11	28	3	0.7	0.2	5	0.5	0.7	42.4	86.3	9.87	35.4	8.4	0.61	7.5	1.2	6.6	1.2	3.5	0.51	3.2	0.48
THERM-RB-6	100		73.2698	14.9315	5.82503	0.774101	1.77283	1.1562	1.60766	0.517536	0.0902935	0.055057	6	2	7	191	173	71	108	20	1	20	10	120	21	1	5	12	30	25	0.5	0.2	9	0.5	0.5	22.7	46.8	5.41	19.7	5.3	0.36	6.4	1.4	9.5	2.2	7.3	1.2	8.2	1.26
ETHERM-BB-7	96.5		71.726	17.7621	4.32848	0.0382568	1.72702	1.98935	1.46469	0.743275	0.166144	0.0546526	2	1	7	384	246	15	180	20	1	20	10	60	22	1	5	20	15	3	0.6	0.2	5	0.7	2.8	25.7	54.3	6.02	20.5	4.2	0.41	3.3	0.5	2.8	0.5	1.5	0.23	1.6	0.23
ETHERM-MA-8	97		68.9612	20.0137	4.26855	0.0157677	2.06107	2.77061	1.01364	0.540608	0.25341	0.101364	3	2	11	349	313	19	226	20	2	20	10	70	24	1	5	14	18	2	0.8	0.2	6	0.9	1.8	59.1	112	11.4	37.2	6.2	0.76	4.4	0.7	3.6	0.7	1.9	0.27	1.6	0.25
ETHERM-MB-9	98		69.4745	19.1495	4.20196	0.0273565	1.79459	2.24323	2.30889	0.503359	0.219946	0.0765982	3	2	8	293	474	29	212	20	3	20	10	70	24	1	5	14	16	2	0.9	0.2	7	1.3	1.4	61.3	120	12.2	39.6	7.7	0.76	6.2	0.9	5.4	1	2.9	0.42	2.6	0.37
ETHERM-F3-10	96.3		69.4602	18.2736	4.66464	0.0124541	1.82283	3.80418	1.17748	0.611385	0.13926	0.0339659	4	2	5	269	161	18	183	20	1	20	10	80	24	1	5	14	27	2	0.8	0.2	7	0.5	1.3	40.5	88.9	10.2	35.5	7.2	0.51	4.7	0.8	4.1	0.7	2	0.29	1.9	0.28
ETHERM-MD-11	99.2		63.6686	23.2918	4.31329	0.0212864	1.78133	2.98009	2.47594	1.12034	0.246474	0.10083	4	2	11	411	350	27	208	20	2	20	10	70	27	1	5	25	21	3	0.9	0.2	7	1.9	1.3	66.6	127	13.4	45.2	8.5	0.8	6.3	1	5.4	1	2.8	0.39	2.6	0.41
ETHERM-ME-12	99.2		63.4353	23.5394	4.03823	0.0180985	1.70805	3.07675	2.72609	1.0746	0.270347	0.113116	4	2	12	507	410	28	290	20	2	20	10	60	27	1	8	28	13	5	1	0.2	7	1.2	3.1	55.1	109	11.7	40	7.5	0.93	5.7	0.9	5	0.9	2.8	0.4	2.6	0.38
TEN-F2-13TOP	96		76.7723	14.3013	2.39072	0.0161535	1.39997	0.732293	3.00456	1.15228	0.176612	0.0538451	3	3	10	402	123	20	216	40	1	20	10	60	18	1	5	29	11	2	0.6	0.2	4	0.8	1.7	29.3	61.2	6.92	24.9	5.4	0.51	5.1	0.8	4	0.7	1.9	0.26	1.9	0.28
TEN-F2-14MID	96		77.5859	13.8369	2.7717	0.0140203	1.5638	0.496101	2.56678	0.927494	0.172557	0.0647089	4	4	14	307	224	28	151	30	2	20	10	60	18	1	5	32	12	2	0.5	0.2	4	0.7	3.2	30	61.9	7.14	26.6	6.4	0.57	5.9	1	5.4	1	2.9	0.42	2.8	0.43
TEN-F2-15BTM	96		72.5811	16.6874	4.52503	0.0116844	1.7739	0.786038	2.67678	0.786038	0.12959	0.0424886	4	3	5	332	75	12	182	20	1	20	10	70	23	1	5	18	20	2	0.6	0.2	7	0.5	1.1	28	63.1	7.19	24.9	5.4	0.41	4.1	0.6	3.2	0.5	1.4	0.2	1.5	0.22
BZR-BB-16BTM	96.5		74.9557	15.5107	3.71735	0.0152172	1.53259	0.826078	2.85866	0.413039	0.138042	0.0326083	2	3	5	153	86	11	161	20	1	20	10	50	19	1	5	9	12	2	0.5	0.2	6	0.5	0.5	36.5	74.7	7.73	25.4	4.8	0.44	3.1	0.5	2.5	0.4	1.1	0.16	1	0.14
BZR-BB-17TOP	96.5		67.3484	13.0726	2.50204	0.805702	1.29693	11.6953	2.27249	0.849315	0.111329	0.0459089	2	2	5	318	128	65	101	20	1	20	10	50	16	1	5	26	11	2	0.5	0.2	4	0.6	2.6	43.3	77.2	8.58	31.1	7.3	0.62	8.1	1.4	9.2	2	6.7	1.08	7.3	1.17
BZR-MA-18	97		65.5279	23.7693	4.23411	0.0459255	1.98264	1.97144	1.62419	0.526463	0.262111	0.0560067	6	2	15	261	155	34	231	20	3	20	10	60	27	1	5	12	13	2	0.6	0.2	7	0.7	0.6	73.8	136	14.1	46	8.1	1	6.2	1	5.6	1.1	3.1	0.43	2.7	0.39
BZR-MB-19	98.5		75.6642	16.0906	2.77878	0.0175733	1.50472	1.90012	1.39488	0.450317	0.154865	0.0439334	2	2	7	460	187	17	146	20	1	20	10	60	19	1	5	13	13	2	0.5	0.2	6	0.9	1.3	43.4	82.1	8.44	26.9	4.8	0.51	3.8	0.6	3.2	0.6	1.5	0.22	1.3	0.19
PR-BB-20	96.5		82.0245	11.8259	1.87009	0.0140527	1.25393	0.648586	1.56742	0.681015	0.0929639	0.0216195	1	2	5	150	185	9	86	20	1	20	10	50	15	1	5	26	9	2	0.5	0.2	4	0.5	2.6	22	45.7	5.02	17.1	3.3	0.33	2.5	0.4	1.9	0.3	0.9	0.13	0.9	0.13
PR-MB-21	98		66.5973	22.0312	4.73536	0.0111947	2.02624	1.99266	1.54487	0.73885	0.23285	0.0895576	4	3	7	846	156	34	320	20	1	20	10	180	27	1	5	14	23	2	1.1	0.2	7	1.9	0.5	55.3	108	11.5	39	7.2	0.76	5.7	0.9	4.9	1	2.8	0.42	2.8	0.43
PR-MA-22	97		67.4902	21.5821	5.09593	0.0190397	2.31837	1.54558	1.14238	0.459193	0.257596	0.0895987	3	1	9	300	127	50	212	20	2	20	10	100	25	1	5	11	18	2	0.6	0.2	7	1.5	0.5	59.7	114	12	40.2	6.9	0.86	6	1	5.7	1.2	3.6	0.5	3.1	0.49
PR-RL-23	100		44.8848	14.8934	23.868	3.49959	3.26019	4.6557	4.17449	0.384967	0.138348	0.240604	5	2	5	431	930	44	132	20	4	30	10	70	18	1	13	9	21	13	0.5	0.2	4	1.5	0.5	36.5	71.7	8.22	30.4	7.3	0.73	7.3	1.2	7	1.4	4.3	0.65	4.7	0.76
PR-RB-24	100		63.9002	20.6016	5.03998	0.0702199	3.35244	1.52898	4.76816	0.498335	0.194804	0.0453032	6	1	9	551	1293	22	183	20	3	20	10	80	25	1	5	12	30	2	0.5	0.2	7	0.5	0.5	50.9	101	11	38.8	7.7	0.7	6	0.9	4.7	0.8	2.1	0.28	1.7	0.25
CS-F1-25	95.8		74.7564	15.0518	3.62656	0.0149769	2.22515	0.609776	2.97399	0.4921	0.19577	0.0534891	2	2	12	251	100	14	126	20	2	20	10	60	19	1	5	13	15	2	0.5	0.2	4	0.5	0.8	42	79.1	8.06	25.7	4.5	0.55	3.5	0.6	3	0.5	1.4	0.21	1.4	0.22
CS-F2-26	96		71.8119	17.7329	3.53156	0.0246887	1.83555	1.39545	2.69429	0.729927	0.189996	0.0536711	3	2	7	989	290	18	202	20	2	20	10	60	23	1	5	20	17	2	0.7	0.2	6	1	1.4	50.3	97.6	10.4	34.5	6.5	0.63	4.8	0.7	3.8	0.7	1.9	0.26	1.7	0.26
CS-MA-27	97		71.3206	18.452	3.73114	0.0117938	2.04784	1.29732	2.26227	0.600414	0.212289	0.0643301	2	2	8	291	143	13	194	20	2	20	10	60	23	1	5	15	17	2	0.5	0.2	6	0.8	0.5	46.5	91.1	9.22	29.9	5	0.63	3.2	0.5	2.8	0.5	1.4	0.2	1.4	0.21
CS-MA-28	97		63.2918	22.4206	4.65333	0.0401336	1.89821	2.02838	3.04799	1.90906	0.493535	0.216939	4	3	32	652	372	22	202	20	9	20	10	150	24	1	37	55	22	6	0.6	0.2	3	1.4	2.5	75	136	13.3	40.8	6.4	1.09	4.3	0.6	3.4	0.7	2	0.26	1.8	0.27
CS-MB-29	98		66.3795	21.3887	4.45913	0.0151157	1.84627	1.52237	3.1635	0.885347	0.242931	0.0971723	3	2	7	810	400	19	288	20	2	20	10	80	27	1	5	20	24	4	1	0.2	7	1.9	0.6	53.3	105	11.2	37.6	6.7	0.71	5.1	0.8	4.2	0.8	2.1	0.27	1.6	0.27
CS-MB10-30	98		49.9226	17.1032	3.05901	0.863211	1.25085	23.8653	2.31593	1.39947	0.158524	0.0619233	3	4	5	462	204	46	134	20	1	20	10	50	20	1	5	30	16	3	0.5	0.2	5	1.7	0.5	57.2	105	11.1	37.7	7.1	0.56	6.1	1	6.2	1.4	4.6	0.76	5.5	0.92
BEND-MA-31	97		73.1875	17.0936	3.36284	0.0128927	2.28845	1.00993	2.2025	0.580171	0.186944	0.0752074	2	3	8	272	184	13	162	20	2	20	10	70	22	1	5	15	14	2	0.5	0.2	6	0.9	0.5	44.8	87.4	8.9	28.9	4.9	0.55	3.3	0.5	2.8	0.5	1.3	0.18	1.1	0.16
BEND-MB-32	98		64.7927	22.7816	4.57167	0.0197338	1.87471	1.83086	2.6531	1.08536	0.280659	0.109632	3	4	8	705	268	33	375	20	2	20	10	90	29	1	13	25	23	7	1.5	0.2	7	3.7	1.3	67.1	130	13.9	47.3	9	1	7.1	1.1	6.1	1.2	3.3	0.46	2.8	0.44
BEND-MC-33	99		68.0702	21.3251	4.33308	0.018149	2.69967	1.74684	1.17969	0.408353	0.17355	0.0453726	2	2	5	294	230	26	172	20	2	20	10	90	27	1	5	11	20	2	0.6	0.2	7	1.7	0.8	51	105	11.2	37.6	7.7	0.71	6.1	1	5.7	1	2.7	0.37	2.2	0.29
BEND-TS3-34	100.5		66.2234	22.6835	5.34112	0.0205428	2.30295	0.16218	2.83274	0.281111	0.130825	0.021624	7	1	5	65	28	25	248	20	4	20	10	140	33	1	5	8	34	2	0.8	0.2	10	0.5	0.6	41	89.3	10.6	38.1	9.1	0.47	7.3	1.1	5.9	1.1	2.6	0.34	1.9	0.27
BEND-TS2-35	101		66.4185	22.6866	3.64701	0.0150171	2.02731	0.697223	3.11069	1.14774	0.174842	0.0750855	8	1	11	227	109	29	214	20	5	20	10	90	30	1	5	27	27	4	0.7	0.2	15	1	0.6	61.7	125	13.8	49.6	10.7	0.83	8.7	1.4	7	1.2	3.2	0.46	2.9	0.45
WN-SC-36BR	95.5		68.227	20.1817	4.07677	0.0348154	3.17831	1.95416	1.15677	0.797385	0.292	0.101077	4	2	16	425	202	21	201	20	2	20	10	50	24	1	5	21	18	2	0.6	0.2	6	0.5	1.1	49.7	101	10.9	36.8	6.8	0.86	5.1	0.8	4.4	0.8	2.2	0.32	1.9	0.28
WN-SC-37R	95.5		73.8181	16.4201	3.46684	0.0679992	2.70882	1.69441	0.958677	0.624255	0.185047	0.055737	9	4	28	661	311	34	248	20	9	40	10	270	17	1	5	23	20	22	0.9	0.2	4	0.8	0.5	27.9	55	6.34	22.8	5.4	0.89	5.3	1	5.9	1.3	4.1	0.66	4.9	0.78
WN-SC-38AR	95.5		57.8439	12.9485	21.3873	0.674212	1.78599	2.43342	1.37298	1.06043	0.281294	0.212087	3	2	9	331	157	16	157	20	1	20	10	40	20	1	5	15	20	2	0.5	0.2	6	0.5	0.5	35.4	70.4	7.7	26.4	5.4	0.55	4.1	0.6	3.4	0.6	1.6	0.23	1.4	0.19
WN-MB-39	98		74.4962	16.1313	3.28337	0.0131774	2.00955	1.68012	1.60325	0.56004	0.157031	0.065887	2	2	6	358	232	15	156	20	1	20	10	80	23	1	5	14	19	2	0.5	0.2	6	0.6	1.4	45.8	91.4	9.76	32.6	6.4	0.53	4.6	0.7	3.6	0.6	1.6	0.22	1.4	0.21
WN-MA-40	97		70.6376	19.4253	3.63184	0.0111065	2.28795	1.73262	1.39942	0.61086	0.196586	0.0666393	3	3	8	1380	533	16	197	20	1	20	10	60	23	1	5	19	19	2	0.6	0.2	7	0.9	2.2	45.3	89.1	9.27	30.2	5.4	0.59	3.7	0.6	3.4	0.6	1.7	0.23	1.5	0.22
DV-MB-41OXTOP	98.5		69.59	20.2176	3.57043	0.0122734	2.33194	2.14226	1.26081	0.624826	0.194142	0.055788	3	3	6	742	303	14	204	20	1	20	10	80	27	1	5	14	27	2	0.6	0.2	7	0.9	0.5	50.1	105	11.4	37.5	6.9	0.59	4.9	0.7	3.6	0.6	1.5	0.19	1.2	0.21
DV-MB-42RDCDMID	98		67.2452	21.996	3.82733	0.0122385	2.33645	2.11393	1.44637	0.745438	0.21028	0.0667557	3	3	5	414	390	16	237	20	2	20	10	80	28	1	5	16	27	2	0.7	0.2	7	0.7	1	44.9	94.4	10.2	34.3	6.6	0.57	4.3	0.7	3.8	0.6	1.6	0.2	1.2	0.18
DV-MB-43OXBTM	98		65.4641	22.9457	4.15144	0.0112811	2.05316	2.21109	1.70344	1.0717	0.286539	0.10153	4	3	7	493	324	22	340	20	1	20	10	90	30	1	5	22	32	2	1.2	0.2	8	1.5	0.9	59	119	12.8	43.8	8.1	0.84	5.9	0.9	4.8	0.9	2.4	0.33	2	0.31
DV-MA-44	97		68.7933	20.3768	3.71113	0.0148903	3.25296	1.64939	1.20268	0.629975	0.288643	0.0801787	3	2	10	415	256	11	246	20	2	20	10	70	25	1	5	15	21	2	0.8	0.2	6	1.8	0.5	43.7	87.2	8.93	28.9	4.9	0.66	3.5	0.5	2.5	0.4	1.2	0.19	1.3	0.22
DV-MA-45	97		66.6895	23.0492	3.53284	0.0102898	2.93832	2.01223	0.914652	0.571657	0.212656	0.0685989	4	3	9	289	238	19	199	20	1	20	10	70	28	1	5	15	20	2	0.6	0.2	8	0.8	1.7	57.1	110	11.6	38.2	6.7	0.73	5.4	0.8	4.2	0.7	2	0.29	1.8	0.29
DV-MC-46	99		64.7827	23.4247	4.3441	0.0144803	2.28344	0.768571	3.55325	0.534658	0.204952	0.0891097	3	2	5	365	205	30	267	20	1	20	10	90	29	1	27	16	21	8	0.8	0.2	7	2.6	0.9	60.2	120	12.9	42.6	8.1	0.77	6.9	1.1	6.1	1.1	3.2	0.43	2.5	0.33
DV-MC-47	99		73.1894	17.3341	3.0653	0.0107933	1.85645	0.669185	3.24879	0.518079	0.0971398	0.0107933	5	2	5	701	305	9	172	20	1	20	10	90	25	1	5	9	26	2	0.5	0.2	7	0.9	1.3	21.6	49.8	6.08	22	5.4	0.42	3.8	0.6	2.8	0.4	1	0.14	0.8	0.13
Ang-1A	98.3		65.5515	25.2404	4.24509	0.0172565	2.79555	0.954857	0.253095	0.736275	0.171414	0.0345129	5	1	7	181	83	60	219	20	6	50	10	80	30	1	5	15	30	2	0.6	0.2	10	1.4	0.5	43.6	104	12.8	50.8	12.4	1.12	12.1	2	12.1	2.3	6.4	0.93	6.1	0.92
Ang-2A	97.19		62.2846	23.6077	4.63204	0.00483764	3.95477	3.76126	0.507952	0.955433	0.230997	0.0604705	5	1	33	210	525	17	161	20	1	20	10	30	20	1	43	23	11	46	0.5	0.2	4	2.6	0.6	103	199	19.6	62.8	10.1	1.42	6.7	1	5	0.8	2.1	0.29	1.8	0.27
Ang-2B	96.5		65.598	24.3116	2.51774	0.00341775	3.63421	2.65445	0.581018	0.4557	0.186837	0.0569625	3	1	7	310	412	33	245	20	1	20	10	40	26	1	5	8	23	3	0.5	0.2	7	1.4	0.5	42.7	89.6	9.73	34.3	6.9	0.57	6	1	6.5	1.3	3.9	0.6	4.2	0.61
Ang-2C	96.87		65.09	25.5743	1.73136	0.00226321	3.56456	3.05534	0.282901	0.48659	0.144846	0.0678963	6	1	8	147	256	19	125	20	1	20	10	50	30	1	5	8	7	4	0.5	0.2	11	2.3	0.5	80.2	182	20.5	73.4	15.5	0.63	10.5	1.5	7.3	1.1	2.6	0.31	1.8	0.22
Ang-3A	96		64.8625	28.4348	2.24547	0.00349036	3.43219	0.372305	0.12798	0.116345	0.311806	0.0930763	3	1	10	129	152	13	209	20	1	20	10	30	25	1	17	2	8	6	0.5	0.2	8	2.4	0.5	92	181	17.8	54.9	8.8	0.93	5.2	0.8	3.8	0.6	1.7	0.22	1.3	0.19
Ang-3B	95.8		66.5343	25.1477	3.12104	0.0083706	3.9581	0.346782	0.11958	0.11958	0.536914	0.107622	8	1	61	140	46	28	259	20	5	30	10	100	19	1	19	2	12	10	0.5	0.2	2	7.2	0.5	57.7	116	12.9	45.6	7.7	1.36	5.8	0.9	5.4	1.1	3.1	0.42	2.8	0.44
Ang-4A	83		66.7601	24.1824	3.60555	0.0126309	3.91558	0.539684	0.183722	0.114826	0.616618	0.0688958	11	1	36	143	58	32	311	20	5	20	30	100	21	1	8	3	13	6	0.7	0.2	2	4.9	0.5	59	115	13.1	48.2	8.2	1.8	6.9	1.1	6.1	1.2	3.5	0.49	3.3	0.54
Ang-4B	82.62		67.4596	24.0919	2.97359	0.00816279	3.99977	0.676345	0.116611	0.139934	0.464113	0.0699668	8	1	80	134	35	23	233	20	4	20	10	80	20	1	10	2	12	7	0.5	0.2	2	4.3	0.5	48.5	97.6	10.8	38.8	6.6	1.12	5.1	0.8	4.6	0.9	2.6	0.37	2.3	0.38
Ang-4C	80.8		67.3445	25.3142	2.30768	0.0093713	4.07652	0.269425	0.128855	0.152284	0.338538	0.0585706	6	1	75	106	19	14	233	20	3	20	10	60	22	1	5	3	9	3	0.5	0.2	3	3	0.5	34.6	72.5	7.92	26.9	4.5	0.59	3.2	0.5	3.1	0.6	1.7	0.25	1.6	0.25
W-Ang-1A	80.6		66.8962	23.6978	3.33656	0.0188639	4.15006	1.0611	0.0235799	0.0235799	0.721545	0.0707397	9	1	35	162	105	42	374	20	6	40	10	110	20	1	5	2	18	2	0.7	0.2	2	1.6	0.5	66.7	130	15.3	56.5	10.2	2.14	8.8	1.4	7.9	1.6	4.4	0.65	4.2	0.66
W-Ang-1B	80.5		67.2049	24.1866	3.05641	0.00721987	3.9228	0.746053	0.0842318	0.0962649	0.623315	0.0721987	12	1	78	185	37	28	301	20	4	20	30	100	20	1	5	2	10	5	0.5	0.2	2	3.1	0.5	63.1	125	14	49.6	8.6	1.66	6.3	0.9	5.6	1.1	3.3	0.46	3.1	0.5
W-Ang-1C	80.4		67.4452	24.1317	3.24337	0.0084715	4.00581	0.16943	0.084715	0.121021	0.645044	0.145226	9	1	87	154	22	18	253	20	7	30	20	140	19	1	16	3	8	6	0.5	0.2	2	3.3	0.5	39.1	74.6	8.24	29.8	4.9	1.05	3.6	0.5	3.4	0.7	2	0.31	2.1	0.34
W-Ang-1D	80.3		66.1896	23.8383	4.26026	0.0131637	3.94912	0.598351	0.23934	0.179505	0.636645	0.0957362	9	1	37	186	75	28	285	20	6	30	20	120	20	1	7	3	12	4	0.6	0.2	2	3.8	0.5	52.9	102	11.2	41.2	7.2	1.61	6	0.9	5.4	1	3.1	0.43	2.9	0.49
W-Ang-1E	80.2		66.4082	23.8878	4.41819	0.0135376	3.83976	0.295366	0.221525	0.172297	0.583349	0.15999	10	1	41	135	52	17	293	20	7	30	30	140	19	1	9	4	9	4	0.6	0.2	2	3.9	0.5	32	64.1	7.18	25.5	4.5	0.98	3.7	0.6	3.5	0.7	2	0.28	1.9	0.3
W-Ang-1F	80.1		61.6371	30.645	2.63861	0.0115729	3.28669	0.462915	0.173593	0.40505	0.461757	0.277749	5	1	36	208	127	13	186	20	2	20	10	40	24	1	5	12	14	3	0.5	0.2	5	0.8	0.5	87.4	177	17.5	54.6	8	1.08	4.5	0.7	3.2	0.5	1.5	0.19	1.1	0.16
W-Ang-1G	79.71		68.1443	24.7182	2.51814	0.00593902	3.80097	0.142536	0.130658	0.11878	0.37297	0.0475121	7	1	108	123	18	9	237	20	3	20	10	60	22	1	22	2	7	12	0.5	0.2	4	9.9	0.5	7.3	16.3	2.03	8	1.6	0.33	1.5	0.3	1.8	0.4	1.2	0.19	1.3	0.23
18MD-TS2.5-1	100.9		59.77	22.09	4.04	0.56	2.52	3.53	5.22	1.59	0.44	0.24	6	3	26	987	663	72	180	20	35	50	10	120	22	1	5	33	12	4	0.9	0.2	2	0.5	0.8	31.3	81.4	12.3	59.6	14.1	2.39	10.7	1.4	7.3	1.6	5	0.76	5	0.77
18MD-TS2-1	101		62.68	23.82	5.22	0.14	3.11	0.78	3.13	0.71	0.29	0.13	4	1	12	265	104	21	184	20	3	20	10	70	26	1	5	18	45	2	0.9	0.2	11	0.5	0.5	23.6	46.5	4.81	16.8	3.4	0.36	3.1	0.5	3.3	0.7	2.3	0.37	2.6	0.41
18MD-TS1.5-1	101.2		74.14	14.23	4.81	0.06	1.55	0.48	1.95	2.08	0.59	0.11	8	2	68	484	218	33	242	50	14	30	10	110	16	1	7	75	11	2	1.5	0.2	2	0.5	5.4	41	79.4	9.3	35.7	7	1.19	6.3	0.9	5.8	1.1	3.3	0.49	3.1	0.54
18MD-TS1-1	101.5		61.33	23.31	3.99	0.07	5.67	0.25	4.51	0.65	0.18	0.04	4	1	5	125	110	35	245	20	4	20	10	40	25	1	5	11	15	6	1	0.2	5	0.9	1	55.4	117	14.3	56.1	11.6	0.77	9.4	1.3	7	1.3	3.3	0.46	2.8	0.41
18MD-TS3.5-1	100.3		61.52	24.51	4.57	0.03	2.07	0.62	5.71	0.71	0.2	0.05	7	1	5	220	48	33	235	20	15	40	10	110	26	1	5	15	18	5	1.1	0.2	7	1	1	71.5	148	16.8	62.8	12.6	1.06	9.8	1.4	7.5	1.3	3.4	0.47	2.7	0.36
18MD-TS3.6-1	100.1		61.89	25.96	3.88	0.04	2.04	0.49	4.07	1.15	0.42	0.07	11	1	21	164	62	25	198	20	4	20	10	60	22	1	7	35	7	2	0.9	0.2	5	0.8	2.2	63.8	133	14.8	56.4	9.9	1.54	6.6	0.9	4.8	0.9	2.3	0.31	1.9	0.28
18MTS-M2-1	72.2		67.04	19.09	5.05	0.03	2.56	1.29	1.86	2.23	0.69	0.16	9	2	57	582	175	22	162	20	8	20	20	110	24	1	5	88	16	2	0.8	0.2	3	1.1	5	41.3	82.8	9.13	34.8	6.3	1.24	5	0.7	4	0.8	2.3	0.32	2.3	0.36
18MTS-M2-2	72.1		73.16	16.67	3.07	0.03	1.86	1.26	1.65	1.66	0.52	0.1	10	2	67	600	279	17	125	20	3	20	20	50	20	1	10	62	12	3	0.8	0.2	2	1.5	3.5	42.7	74.4	7.52	26.5	4.2	0.89	3.1	0.5	2.9	0.6	1.8	0.28	2	0.32
18MTS-M2-3	72		73.37	16.3	3.1	0.03	1.8	1.25	1.97	1.51	0.51	0.15	7	2	46	486	262	19	187	20	6	20	30	90	19	1	6	55	11	2	1.1	0.2	2	1.4	2.8	35.1	68.9	7.66	28.8	4.8	1.04	4.1	0.6	3.3	0.6	2	0.31	2.1	0.35
18MTS-M1-4	70.1		61.28	24.76	5.51	0.02	2.19	2.39	2.72	0.4	0.61	0.13	4	1	30	231	335	19	175	20	4	20	20	90	21	1	5	31	11	2	0.8	0.2	2	0.6	5.5	27.5	54.7	5.81	20.4	3.7	0.91	3.3	0.5	2.9	0.6	1.7	0.25	1.6	0.26
18MTS-M1-5	70		73.19	16.76	4.02	0.02	1.42	0.26	1.93	1.76	0.6	0.03	8	1	68	418	114	21	170	50	3	20	20	80	18	1	5	84	11	2	1.1	0.2	2	1.3	6.7	50.5	85.7	9.18	32.8	5.6	1.17	4.5	0.6	3.7	0.7	2.1	0.3	2	0.3
18SC-UCLI-1	110		81.52	10.87	3.08	0.02	1.5	0.1	2.16	0.26	0.5	0.01	10	1	47	136	133	11	131	20	8	20	20	30	12	1	5	11	6	2	0.7	0.2	1	0.9	1.1	11.8	24.2	2.64	9.8	1.8	0.33	1.6	0.3	1.7	0.3	1.1	0.17	1.2	0.19
18SC-UCLL-1	111		71.22	17.36	4.61	0.03	1.97	0.73	3.17	0.34	0.54	0.02	10	1	71	64	126	18	124	20	10	20	10	30	16	1	5	11	7	2	0.8	0.2	2	1.2	1.2	29.5	46.8	6.21	24.3	4.7	0.98	4	0.5	3	0.6	1.9	0.28	1.9	0.29
18SC-UCLO-1	112		72.67	15.96	3.65	0.02	2.24	1.23	2.39	1.26	0.49	0.09	9	3	48	797	337	84	148	20	11	20	50	40	17	2	5	49	7	2	0.8	0.2	2	0.6	2.8	123	300	34.8	149	34.1	7.44	27.2	3.6	18.2	3.2	9.6	1.47	10.7	1.69
18SC-UCLT-1	113		66.82	19.54	5.4	0.05	2.96	0.88	3.17	0.47	0.71	0.01	11	1	61	35	105	15	222	20	9	20	20	40	20	1	6	19	9	2	0.9	0.2	2	1	2.3	5.5	7.3	1.03	4.2	0.9	0.21	1.3	0.3	2.3	0.5	1.7	0.25	1.7	0.28
18SC-UCLW-1	114		75.81	13.98	2.91	0.03	1.95	0.32	3.24	1.34	0.4	0.02	22	2	27	115	72	34	197	30	9	20	10	30	9	1	5	53	4	2	0.9	0.2	1	0.5	2.3	28.5	42.9	6.17	22.6	4.7	0.9	4.5	0.8	4.9	1	3.1	0.5	3.3	0.51
18AD-MT-lowestbottom	82		77.14	14.11	2.68	0.01	1.09	0.64	1.64	2.09	0.55	0.04	7	2	58	467	221	18	206	40	7	20	20	60	15	2	5	85	8	2	1	0.2	1	0.7	6.2	32	60.3	6.57	24.1	4.5	0.93	3.7	0.6	3.4	0.7	2	0.31	2	0.32
18AD-MT-lowestmiddle	81.8		72.67	15.11	3.19	0.02	1.58	2.04	2.83	1.97	0.44	0.13	7	1	46	620	848	29	148	30	11	20	10	60	16	1	5	63	8	2	1	0.2	2	0.6	2.8	36.6	68.6	7.67	29.5	5.5	1.29	5	0.8	4.6	0.9	2.8	0.41	2.7	0.43
18AD-MT-lowesttop	81.6		66.23	18.88	5.26	0.02	2.76	1.58	1.89	2.74	0.57	0.07	9	2	57	417	277	23	130	40	9	20	30	90	22	1	5	120	9	4	0.7	0.2	2	0.9	7.7	32.7	61.2	6.97	26.5	5	1.04	4.4	0.7	3.9	0.8	2.5	0.37	2.6	0.39
18AD-MT-B1	81.4		70.67	18.54	4.59	0.02	1.28	0.97	1.42	1.79	0.69	0.03	10	2	82	460	249	21	218	40	5	20	20	70	20	1	6	66	13	2	1	0.2	2	0.9	6.7	38.7	70.8	7.88	29.3	5.4	1.29	4.4	0.7	4	0.8	2.3	0.34	2.3	0.35
18AD-MT-B2	81.2		67.76	19.88	4.77	0.02	1.46	1.6	1.94	1.78	0.7	0.09	11	2	76	522	291	24	228	30	9	20	20	110	20	1	5	64	15	2	1	0.2	1	0.5	7.9	43.1	76.3	8.78	33.7	6.2	1.41	4.8	0.7	4.1	0.8	2.3	0.35	2.2	0.37
18HB-CY-1	83		59.14	22.58	4.34	0.05	3.04	4.3	4.33	1.26	0.63	0.33	7	1	30	1170	645	18	307	20	4	20	10	60	25	1	5	32	24	12	1.3	0.2	3	0.5	0.5	36.1	74.1	8.75	34.5	6.9	1.27	5.2	0.7	3.7	0.6	1.8	0.25	1.6	0.25
18HB-CY-2	82.8		61.5	22.1	4.7	0.04	3.14	3.41	3.16	1.31	0.46	0.18	7	1	48	890	343	18	198	20	3	20	10	70	24	1	5	42	17	2	0.9	0.2	3	0.5	1.5	29.8	61.7	7.41	28.3	5.8	1.08	4.4	0.7	3.5	0.6	1.7	0.24	1.5	0.23
18HB-CY-3	82.6		75.06	13.46	4.36	0.03	1.59	0.6	1.21	2.83	0.69	0.16	12	2	206	969	136	25	227	90	11	40	20	110	16	2	7	113	11	4	1.1	0.2	2	0.5	6.7	34.9	63.4	7.53	28.6	5.5	1.1	4.5	0.7	4.2	0.8	2.6	0.39	2.6	0.42
*Age determined via stratigraphic position and/or U-Pb analysis
†Eu/Eu* = Eun/((Smn + Gdn)/2)
§Dy/Dy* = (Dyn/(Lan4/13 * Ybn9/13))
[truncated: 13 more columns]
